RESEARCH ARTICLE

# Investigation on the Gas-Phase Decomposition of Trichlorfon by GC-MS and Theoretical Calculation

Kezhi Jiang<sup>1</sup>, Ningwen Zhang<sup>1</sup>, Hu Zhang<sup>2</sup>, Jianmei Wang<sup>2</sup>, Mingrong Qian<sup>2\*</sup>

**1** Key Laboratory of Organosilicon Chemistry and Material Technology, Hangzhou Normal University, Hangzhou, Zhejiang, China, **2** MOA Key Lab for Pesticide Residue Detection, Institute of Quality and Standard for Agro-products, Zhejiang Academy of Agricultural Sciences, Hangzhou, Zhejiang, China

\* [qianmr@mail.zaas.ac.cn](mailto:qianmr@mail.zaas.ac.cn)

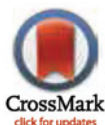

## Abstract

The gas phase pyrolysis of trichlorfon was investigated by the on-line gas chromatography – mass spectrometry (GC-MS) pyrolysis and theoretical calculations. Two reaction channels were proposed in the pyrolytic reaction, by analyzing the detected pyrolytic products in the total ion chromatography, including 2,2,2-trichloroacetaldehyde, dimethyl phosphite, and dichlorvos. Theoretical calculations showed that there is an intramolecular hydrogen bond between the hydroxyl group and the phosphate O atom in trichlorfon, through which the hydroxyl H atom can be easily transferred to phosphate O atom to trigger two pyrolytic channels. In path-a, migration of H atom results in direct decomposition of trichlorfon to give 2,2,2-trichloroacetaldehyde and dimethyl phosphite in one step. In path-b, migration of H atom in trichlorfon is combined with formation of the O-P bond to give an intermediate, followed by HCl elimination to afford dichlorvos. Path-a is kinetically more favorable than path-b, which is consistent with the GC-MS results.

## OPEN ACCESS

**Citation:** Jiang K, Zhang N, Zhang H, Wang J, Qian M (2015) Investigation on the Gas-Phase Decomposition of Trichlorfon by GC-MS and Theoretical Calculation. PLoS ONE 10(4): e0121389. doi:10.1371/journal.pone.0121389

**Academic Editor:** Dennis Salahub, University of Calgary, CANADA

**Received:** August 26, 2014

**Accepted:** January 31, 2015

**Published:** April 9, 2015

**Copyright:** © 2015 Jiang et al. This is an open access article distributed under the terms of the [Creative Commons Attribution License](https://creativecommons.org/licenses/by/4.0/), which permits unrestricted use, distribution, and reproduction in any medium, provided the original author and source are credited.

**Data Availability Statement:** All relevant data are within the paper and its Supporting Information files.

**Funding:** This work received financial support from the National Science Foundation of China (No. 21205025). The funders had no role in study design, data collection and analysis, decision to publish, or preparation of the manuscript.

**Competing Interests:** The authors have declared that no competing interests exist.

## Introduction

Trichlorfon (TCF, [Fig. 1](#)) is an organophosphorus pesticide (OP) that is widely used to control agricultural pests because of its high insecticidal activity, acute toxicity, and relatively low environmental persistence [1–5]. It is difficult to remove OP from organic material using water, as it is for many other types of pesticide, and OP residues are often found on vegetable and fruit skins and even in groundwater. Methods have been developed to quantify TCF residues in fruits and vegetables [6] to allow food safety to be ensured.

Methods for analyzing OPs generally include gas chromatography (GC) [7,8] and high performance liquid chromatography (HPLC) [9,10]. Some OPs have been found to undergo pyrolysis in the heated GC injector port when they are analyzed by GC or GC-mass spectrometry (MS) [11–14]. TCF is a common OP but, unusually, it has no garlic-like odor. When TCF comes into contact with an alkaline medium it is converted into dichlorvos (DCV), which is actually much more toxic than TCF [15]. It is essential to investigate the thermostability and

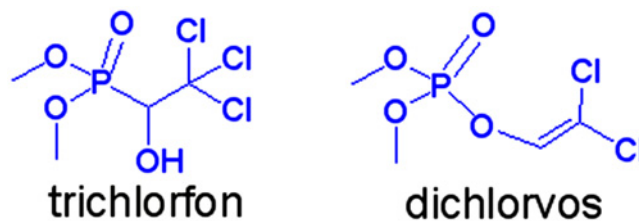

**Fig 1. Structures of trichlorfon and dichlorvos.**

doi:10.1371/journal.pone.0121389.g001

pyrolytic behavior of TCF, so that unnecessary errors can be avoided when TCF is analyzed in environmental media. Herein, we present a detailed mechanistic investigation of the decomposition pathways of TCF when it is analyzed by GC-MS.

## Materials and Methods

### Chemicals

Trichlorfon (TCF, *O,O*-dimethyl-2,2,2-trichloro-1-hydroxyethylphosphonate, 98.8%) and dichlorvos (DCV, *O,O*-dimethyl-*O*-2,2-dichlorovinylphosphate, 99.1%) were provided by the Shanghai Pesticide Research Institute (Shanghai, China). Methanol (HPLC grade) was obtained from Merck (Darmstadt, Germany).

### GC-MS experiments

The GC-MS experiments were performed using a Trace 2000 GC/DSQ MS instrument (Thermo-Fisher Scientific, Waltham, MA, USA) equipped with an HP-5MS capillary column (30 m long, 0.25 mm id, 0.25  $\mu\text{m}$  film thickness; Agilent Technologies, Santa Clara, CA, USA) and the NIST (V2.0) mass spectra library. Xcalibur software (Version 1.4; Thermo-Fisher Scientific) was used to control the GC-MS instrument and to acquire and process the data.

Unless otherwise stated, the GC conditions were as described next. The injector and transfer line temperatures were both 250°C and the carrier gas (Helium, 99.999%) was used at a constant flow rate of 1.0 mL min<sup>-1</sup>. The GC oven temperature program was 50°C for 2 min, increased at 15°C min<sup>-1</sup> to 260°C, which was held for 5 min. Each sample was dissolved in CH<sub>3</sub>OH and 0.5  $\mu\text{L}$  of the solution was injected into the GC.

### Theoretical calculations

The theoretical calculations were performed using the Gaussian 09 program [16]. Due to the great accuracy, middle cost and high popularity of the DFT functional [17], the equilibrium geometries of the target species were optimized at the B3LYP/6-311+G(d,p) level. The M06-2X functional were also used to optimize these species by at the 6-311+G(d,p) level for comparison, since it provides the better optimization for energetic of the internal hydrogen bonds and reaction barriers [17]. Each optimized structure was identified as the true energy minimum if imaginary frequencies were absent. Transition states were identified by the presence of a single imaginary vibration frequency and the normal vibrational mode. The transition states were further confirmed using intrinsic reaction coordinate calculations. The optimized structures were visualized using GaussView (Version 3.09) software. Vibrational frequencies and zero point energies (ZPE) for all the key species were calculated at the same level of theory. Scaled frequencies were not considered since the errors on the calculated thermodynamical properties are almost negligible at this theoretical level [14,18]. Data for the geometries of all of the structures that were determined are available in the Supporting Information (S1–S9 Tables).

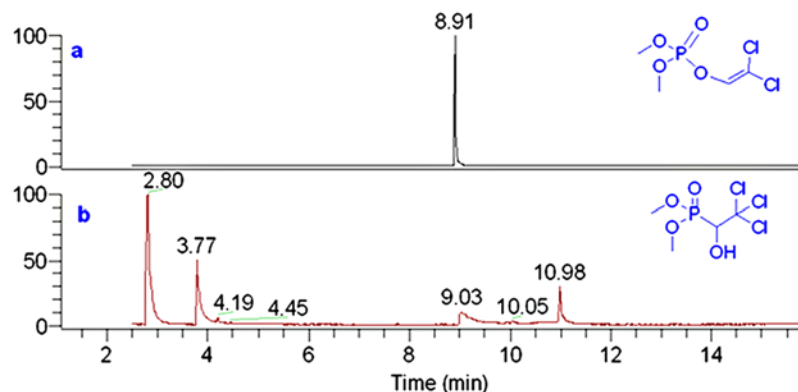

**Fig 2. TIC of dichlorvos (a) and trichlorfon (b) by GC-MS.**

doi:10.1371/journal.pone.0121389.g002

## Results and Discussion

### GC-MS analysis

Total ion current chromatograms (TIC), obtained using the GC-MS system, for DCV and TCF standards are shown in Fig. 2-a and Fig. 2-b, respectively. As can be shown in Fig. 2-a, only a peak at  $t_R$  8.91 min, corresponding to DCV, was observed in the TIC. Nevertheless, four major components were observed in Fig. 2-b. By comparing with the standard spectra in the NIST library, the components at  $t_R$  2.80 min,  $t_R$  3.77 min,  $t_R$  9.03 min and  $t_R$  10.98 min were identified as 2,2,2-trichloroacetaldehyde (TCA), dimethyl phosphite (DMP), DCV and TCF, respectively.

It is noteworthy that the sum of the molecular masses of TCA ( $C_2HCl_3O$ , 146 Da) and DMP ( $C_2H_7O_3P$ , 110 Da) is identical to that of TCF ( $C_4H_7Cl_3O_2P$ , 256 Da). The mass difference between DCV ( $C_4H_7Cl_2O_4P$ , 220 Da) and TCF was found to be the same as that of HCl (36 Da). Thereby, two reaction pathways (Fig. 3) were postulated to interpret the pyrolysis of TCF in the heated GC injector. In reaction pathway path-a, the gas phase decomposition of TCF affords TCA and DMP, and the pyrolytic products of path-b are DCV and HCl. The HCl product of path-b was eluted from the capillary column before the solvent (methanol), so was not detected in the TIC (which was acquired from 2.5 min to 21 min after injection). Interestingly, a small peak at  $t_R$  6.04 min was observed in the TIC of TCF (Fig. 2-b), which corresponds to octamethylcyclotetrasiloxane, originating from the degradation of the capillary column

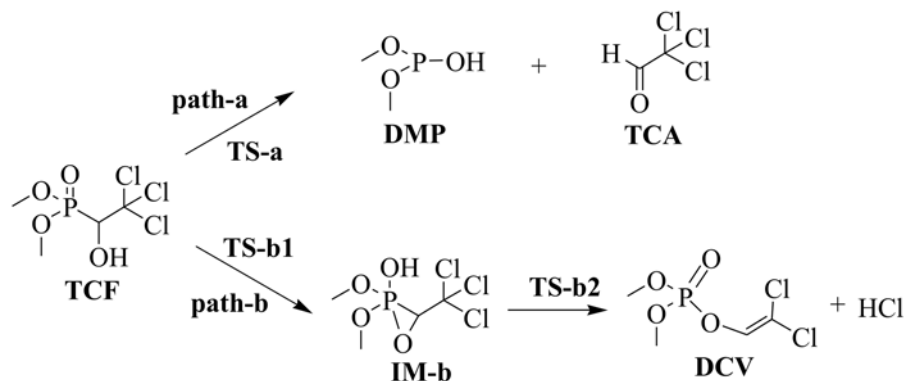

**Fig 3. The proposed pyrolysis pathways of trichlorfon.**

doi:10.1371/journal.pone.0121389.g003

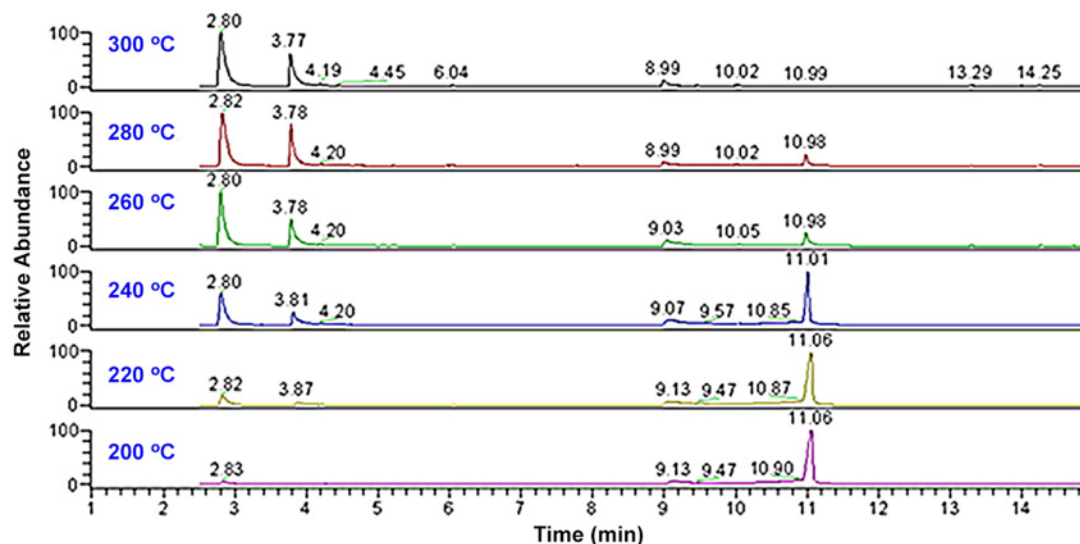

**Fig 4. A series of TIC of trichlorfon with different GC injector temperatures.**

doi:10.1371/journal.pone.0121389.g004

catalyzed by the pyrolytic product (HCl) of trichlorfon. Comparison of the peak area of these pyrolytic products indicated that the reaction path-**a** was more favored than path-**b** under the GC-MS conditions.

To further investigate the effect of the temperature on the pyrolytic reaction, a series of on-line pyrolytic experiments were carried out for TCF, in which the GC injector temperature was set at 300°C, 280°C, 260°C, 240°C, 220°C, and 200°C, respectively. All the TIC were listed together in Fig. 4, in which the chromatographic peak at  $t_R$ 10.98 min (TCF) was almost not observed in the TIC acquired at the GC injector temperature of 300°C, indicating that almost all of the TCF underwent pyrolysis to mainly afford TCA and DMP. With reducing the injector temperature, an increasing peak area for TCF and a decreasing peak area for the products were obtained in Fig. 4.

## Fragmentation pathways

The spectroscopic characteristics of TCF have been investigated previously [19], but the reactivity of TCF has not been investigated. We performed theoretical calculations to probe the mechanisms involved in the pyrolytic reactions of TCF. Full details of the structures of the species involved in the reactions were provided in Fig. 5, the corresponding thermodynamical parameters were summarized in Table 1, and data for the geometries of all of the structures are available in the Supporting Information. Noteworthy, one could notice that the energy barriers for both pathways are qualitatively similar at both B3LYP and M06-2X levels (Table 1), and thus only calculated results at 250°C (the pyrolytic temperature), obtained by at the B3LYP/6-311+G(d,p) level, were used for the following discussion.

As is shown in Fig. 5, there is an intramolecular hydrogen bond (2.165 Å long), O...HO, between the hydroxyl group and the phosphate O atom in the optimized structure of TCF. The hydroxyl H atom can easily migrate to the phosphate O atom in the pyrolytic reaction pathways through the intramolecular hydrogen bond. In reaction pathway of path-**a**, migration of the hydroxyl H atom is accompanied by cleavage of the P-C bond (1.884 Å in TCF versus 2.029 Å in TS-**a**), leading to direct decomposition of TCF through a low energy barrier of 87.3 kJ/mol (TS-**a**).

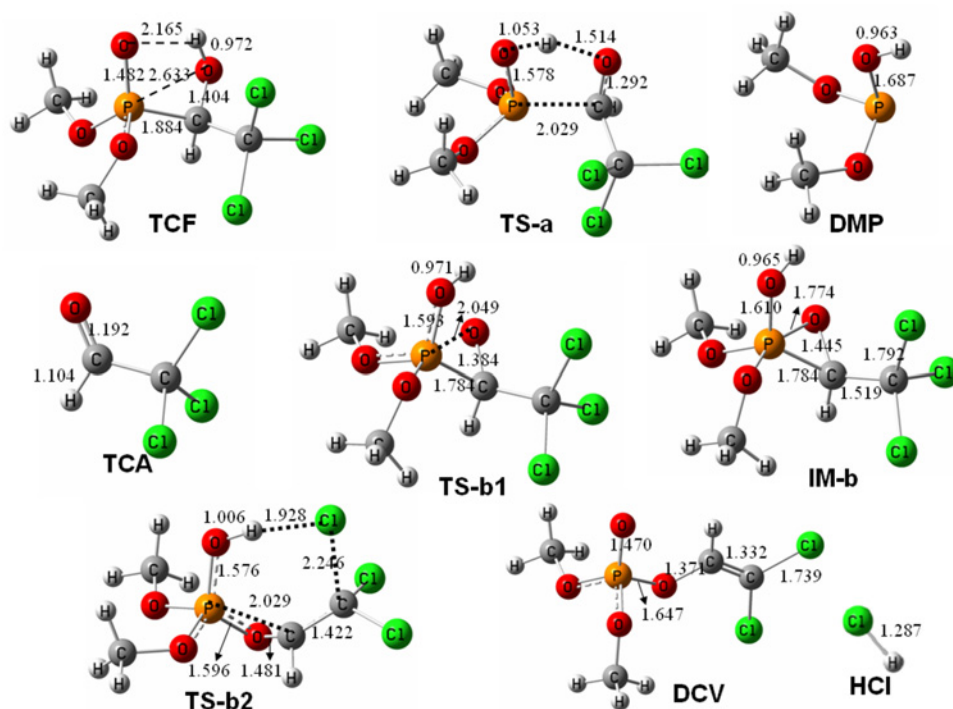

**Fig 5. Optimized structures of the key species involved in the pyrolysis of trichlorfon at B3LYP/6-311+G(d,p).**

doi:10.1371/journal.pone.0121389.g005

In path-**b**, however, migration of the hydroxyl H atom is accompanied with the shrinkage of the distance between the P atom and the hydroxyl O atom to form a P-O bond (2.633 Å in TCF *versus* 2.049 Å in TS-**b1**). The process is completed through a low energy barrier of 132.2 kJ/mol (TS-**b1**), leading to an intermediate of IM-**b** with a three-membered ring [O, P, C], which has a hydroxyl group bonding to the P atom. IM-**b** has also been obtained in the TIC of

**Table 1. Enthalpies (H, in Hartree), relative Enthalpies (rel. H, in kJ mol<sup>-1</sup>), Free Energies (G, in Hartree) and relative Free Energies (rel. G, in kJ mol<sup>-1</sup>) of the structures, obtained at the B3LYP/6-311+G(d,p) level, the M06-2X/6-311+G(d,p) level, and the B3LYP/6-311+G(d,p) level (250°C), respectively.**

| Structure | B3LYP/6-311+G(d,p) |        |               |        | M06-2X/6-311+G(d,p) |        |               |        | B3LYP/6-311+G(d,p) level (250°C) |        |               |        |
|-----------|--------------------|--------|---------------|--------|---------------------|--------|---------------|--------|----------------------------------|--------|---------------|--------|
|           | Enthalpies         | rel. H | Free Energies | Rel. G | Enthalpies          | Rel. H | Free Energies | Rel. G | Enthalpies                       | Rel. H | Free Energies | Rel. G |
| TCF       | -2180.203324       | 0.0    | -2180.265566  | 0.0    | -2179.913378        | 0.0    | -2179.972857  | 0.0    | -2180.180463                     | 0.0    | -2180.319154  | 0.0    |
| TS-a      | -2180.174277       | 76.3   | -2180.234233  | 82.3   | -2179.877079        | 95.3   | -2179.935367  | 98.4   | -2180.152065                     | 74.6   | -2180.285892  | 87.3   |
| DMP       | -1532.686814       |        | -1532.726466  |        | -1532.543952        |        | -1532.583338  |        | -1532.677383                     |        | -1532.759169  |        |
| TCA       | -647.498653        |        | -647.541596   |        | -647.332861         |        | -647.374346   |        | -647.485659                      |        | -647.577742   |        |
| DMP + TCA | -2180.185467       | 46.9   | -2180.268062  | -6.6   | -2179.876813        | 96.0   | -2179.957684  | 39.8   | -2180.163042                     | 45.7   | -2180.336911  | -46.6  |
| TS-b1     | -2180.159715       | 114.5  | -2180.218204  | 124.3  | -2179.868845        | 116.9  | -2179.926339  | 122.1  | -2180.13737                      | 113.1  | -2180.268795  | 132.2  |
| IM-b      | -2180.16076        | 111.8  | -2180.219871  | 120.0  | -2179.874036        | 103.3  | -2179.932093  | 107.0  | -2180.137759                     | 112.1  | -2180.271125  | 126.1  |
| TS-b2     | -2180.148549       | 143.8  | -2180.207877  | 151.5  | -2179.853262        | 157.8  | -2179.911896  | 160.1  | -2180.126191                     | 142.5  | -2180.259106  | 157.7  |
| DCV       | -1719.401163       |        | -1719.459064  |        | -1719.132785        |        | -1719.190264  |        | -1719.381131                     |        | -1719.508546  |        |
| HCl       | -460.823873        |        | -460.845066   |        | -460.786232         |        | -460.807418   |        | -460.821375                      |        | -460.861827   |        |
| DCV + HCl | -2180.225036       | -57.0  | -2180.30413   | -101.2 | -2179.919017        | -14.8  | -2179.997682  | -65.2  | -2180.202506                     | -57.9  | -2180.370373  | -134.5 |

doi:10.1371/journal.pone.0121389.t001

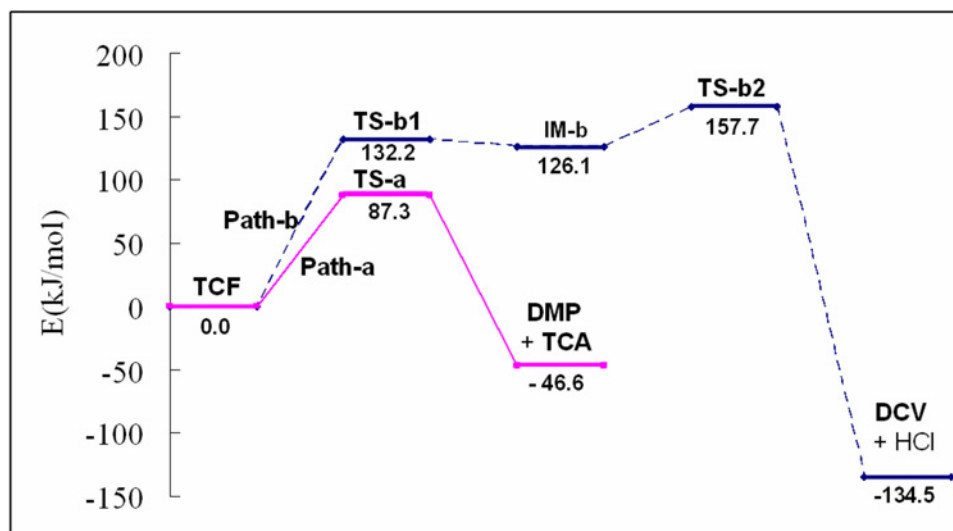

**Fig 6.** The schematic potential energy diagrams for the pyrolytic reactions of trichlorfon.

doi:10.1371/journal.pone.0121389.g006

TCF (the peak at  $t_R$  10.05 min Fig. 2-b), which shares the same characteristic fragment ions (e.g.  $m/z$  221,  $m/z$  139,  $m/z$  109) with TCF in EI-MS (SI Fig.). The subsequent migration of a Cl atom to the hydroxyl H atom initiates HCl elimination from IM-b via the transition state TS-b2, and it results in the pyrolytic product of DCV. DCV is formed by opening the three-membered ring [O, P, C] via the breakage of the P-C bond (1.784 Å in IM-b versus 2.029 Å in TS-b2), and this has a relatively high energy barrier of 157.7 kJ/mol (TS-b2).

As shown in Table 1, the calculated results at the M06-2X/6-311+G(d,p) level revealed a relatively higher energy barrier than the corresponding one. However, both indicated similar results for the two competing reaction channels. Herein, the DFT calculated free energies (250°C) at the B3LYP/6-311+G(d,p) level were used for plotting the potential energy surface (Fig. 6) for the detailed discussion. The sum of HCl and DCV is located at 87.9 kJ/mol below that of TCA and DMP in the free energy, indicating that the products of path-b are thermodynamically more stable than those of path-a. Nevertheless, the energy barrier of path-a is much lower (by 70.4 kJ/mol) than that in path-b, indicating that path-a is much more kinetically favorable than path-b during the pyrolysis of TCF. Quantum calculations were performed herein to qualitatively describe the potential surface of the two reaction channels, and the results are in agreement with the experimental results. Further molecular dynamics simulations on the reactions [20–21] will be investigated in our future work.

## Conclusions

The gas phase pyrolysis of TCF was investigated in on-line GC-MS pyrolysis experiments and using theoretical calculations. The pyrolytic products 2,2,2-trichloro acetaldehyde, dimethyl phosphite, and DCV were detected in the TIC chromatogram of TCF. DFT calculations showed that there is an intramolecular hydrogen bond between the hydroxyl group and the phosphate O atom in TCF, and the hydroxyl H can easily be transferred to the phosphate O atom through this hydrogen bond. Migration of the H atom accompanied with cleavage of the P-C bond results in the formation of TCA and DMP in path-a. In path-b, migration of the H atom together with formation of the P-O bond results in an intermediate IM-b, which subsequently undergoes HCl elimination to afford DCV. Path-a is kinetically more favorable than

path-b, and thus path-a occur more efficiently than path-b in the pyrolysis of TCF under the conditions in a GC injector. The results presented here provide us with a better understanding of the gas-phase pyrolytic reactions that occur during the GC-MS analysis of TCF and will allow analysts to avoid unnecessary errors during the GC or GC-MS analysis of TCF.

## Supporting Information

**S1 Fig.** The EI-MS spectra of (a) dichlorvos and (b) the component at  $t_R$  10.05 min. (TIF)

**S1 Table.** Hard data on geometries for TCF obtained at the B3LYP/6-311+G(d,p) level. (DOC)

**S2 Table.** Hard data on geometries for TS-a obtained at the B3LYP/6-311+G(d,p) level. (DOC)

**S3 Table.** Hard data on geometries for DMP obtained at the B3LYP/6-311+G(d,p) level. (DOC)

**S4 Table.** Hard data on geometries for TCA obtained at the B3LYP/6-311+G(d,p) level. (DOC)

**S5 Table.** Hard data on geometries for TS-b1 obtained at the 3LYP/6-311+G(d,p) level. (DOC)

**S6 Table.** Hard data on geometries for IM-b obtained at the B3LYP/6-311+G(d,p) level. (DOC)

**S7 Table.** Hard data on geometries for TS-b2 obtained at the 3LYP/6-311+G(d,p) level. (DOC)

**S8 Table.** Hard data on geometries for DCV obtained at the B3LYP/6-311+G(d,p) level. (DOC)

**S9 Table.** Hard data on geometries for HCl obtained at the B3LYP/6-311+G(d,p) level. (DOC)

## Acknowledgments

The authors gratefully acknowledge financial support from the National Science Foundation of China (No. 21205025). Computer time was made available on the SGI Aktix 450 sever at Computational Center for Molecular Design of Organosilicon Compounds, Hangzhou Normal University.

## Author Contributions

Conceived and designed the experiments: KJ NZ HZ JW MQ. Performed the experiments: KJ NZ HZ JW MQ. Analyzed the data: KJ HZ MQ. Contributed reagents/materials/analysis tools: NZ JW. Wrote the paper: KJ HZ MQ.

## References

1. Zhang X, Wang HB, Yang CM, Du D, Lin YH. Preparation, characterization of Fe<sub>3</sub>O<sub>4</sub> at TiO<sub>2</sub> magnetic nanoparticles and their application for immunoassay of biomarker of exposure to organophosphorus pesticides. *Biosens Bioelectron.* 2013; 41: 669–674. doi: [10.1016/j.bios.2012.09.047](https://doi.org/10.1016/j.bios.2012.09.047) PMID: [23122753](https://pubmed.ncbi.nlm.nih.gov/23122753/)

2. Sahin A, Dooley K, Cropek DM, West AC, Banta S. A dual enzyme electrochemical assay for the detection of organophosphorus compounds using organophosphorus hydrolase and horseradish peroxidase. *Sens Actuators B*. 2011; 158: 353–360.
3. Liu T, Su HC, Qu XJ, Ju P, Cui L, Ai SY. Acetylcholinesterase biosensor based on 3-carboxyphenylboronic acid/reduced graphene oxide-gold nanocomposites modified electrode for amperometric detection of organophosphorus and carbamate pesticides. *Sens Actuators B*. 2011; 160: 1255–1261.
4. Wang C, Wu QH, Wu CX, Wang Z. Determination of some organophosphorus pesticides in water and watermelon samples by microextraction prior to high-performance liquid chromatography. *J Sep Sci*. 2011; 34: 3231–3239. doi: [10.1002/jssc.201100661](https://doi.org/10.1002/jssc.201100661) PMID: [22038851](https://pubmed.ncbi.nlm.nih.gov/22038851/)
5. Fang T, Yang C, Liao LX. Photoelectrocatalytic degradation of high COD dipterex pesticide by using TiO<sub>2</sub>/Ni photo electrode. *J Environ Sci-China*. 2012; 24: 1149–1156. PMID: [23505884](https://pubmed.ncbi.nlm.nih.gov/23505884/)
6. Li Z, Wang Y, Ni YN, Kokot S. Unmodified silver nanoparticles for rapid analysis of the organophosphorus pesticide, dipterex, often found in different waters. *Sens Actuators B*. 2014; 193: 205–211.
7. Perez-Serradilla JA, Mata-Granados JM, de Castro MDL. Low-level determination of organochlorine pesticides in wines by automatic preconcentration and GC-MS-MS detection. *Chromatographia*. 2011; 71: 899–905.
8. Chai MK, Tan GH. Validation of a headspace solid-phase microextraction procedure with gas chromatography-electron capture detection of pesticide residues in fruits and vegetables. *Food Chem*. 2009; 117: 561–567.
9. Perez-Ruiz T, Martinez-Lozano C, Tomas V, Martin J. High-performance liquid chromatographic assay of phosphate and organophosphorus pesticides using a post-column photochemical reaction and fluorimetric detection. *Anal Chim Acta*. 2005; 540: 383–391.
10. Sanz CP, Halko R, Ferrera ZS, Rodriguez JJS. Micellar extraction of organophosphorus pesticides and their determination by liquid chromatography. *Anal Chim Acta*. 2004; 524: 265–270.
11. Grzegorz B, Jozef K, Edmund M, Janusz S. Gas chromatographic and mass spectrometric properties of ethyl esters of dithiocarbamic acids of primary and secondary amines. *J Chromatogr A*. 1980; 193: 61–69.
12. Gaiand VS, Chai F. Monitoring and confirming primary alkylamines via a simple derivatization procedure. *Analyst*. 1990; 115: 143–145. PMID: [2321767](https://pubmed.ncbi.nlm.nih.gov/2321767/)
13. Singh V, Gupta M, Jain A, Verma KK. Determination of aromatic primary amines at g l<sup>-1</sup> level in environmental waters by gas chromatography—mass spectrometry involving N-allyl-N-arylthiourea formation and their on-line pyrolysis to aryl isothiocyanates. *J Chromatogr A*. 2003; 1010:243–253. PMID: [12974294](https://pubmed.ncbi.nlm.nih.gov/12974294/)
14. Jiang KZ, Bian GF, Qiu HY, Pan YJ, Lai GQ. The Pyrolytic Reaction of Ketonic Hydrazones from S-methyl Dithiocarbamate: A Combined Online GC-MS Pyrolysis and DFT Study. *J Phys Chem A*. 2009; 113: 697–706. doi: [10.1021/jp808273m](https://doi.org/10.1021/jp808273m) PMID: [19132845](https://pubmed.ncbi.nlm.nih.gov/19132845/)
15. Yamashita K. Toxicity of dipterex and its vinyl derivative (DDVP). *Ind Med Surg*. 1962; 31: 170–173. PMID: [14008912](https://pubmed.ncbi.nlm.nih.gov/14008912/)
16. Frisch M J, Trucks G W, Schlegel H B, Scuseria G E, Robb M A, Cheeseman J R, et al. Gaussian 09 (Revision C.01), Gaussian, Inc., Wallingford CT. 2010.
17. Foresman JB, Frisch A. Exploring chemistry with electronic structure methods ( Second Edition). Gaussian, Inc., Pittsburgh, PA., 1996.
18. García E, Humeres JI. Mechanisms of acid decomposition of dithiocarbamates. 4. Theoretical calculations on the water-catalyzed reaction. *J Org Chem*. 2002; 67: 2755–2761. PMID: [11975525](https://pubmed.ncbi.nlm.nih.gov/11975525/)
19. Li LQ, Cheng XL, Zhao YY, He GF, Li F. Density Functional Theory Investigations of the Spectroscopic Characteristics and Luminescent Mechanisms of Dipterex and Dichlorvos. *Spectrosc Spect Anal*. 2014; 34: 122–127.
20. Qi TT, Bauschlicher CW, Lawson JW, Desai TG, Reed EJ. Comparison of ReaxFF, DFTB, and DFT for phenolic pyrolysis. 1. molecular dynamics simulations. *J Phys Chem A*. 2013; 117: 11115–11125. doi: [10.1021/jp4081096](https://doi.org/10.1021/jp4081096) PMID: [24094313](https://pubmed.ncbi.nlm.nih.gov/24094313/)
21. Zou C, Raman S. Large-scale reactive molecular dynamics simulation and kinetic modeling of high-temperature pyrolysis of the gloeocapsomorphaprisca microfossils. *J Phys Chem B*. 2014; 118: 6302–6315. doi: [10.1021/jp501925a](https://doi.org/10.1021/jp501925a) PMID: [24821589](https://pubmed.ncbi.nlm.nih.gov/24821589/)
